# Supplementary material
Source: publisher site journal article supplement (https://www.dovepress.com/article/254635)
Supplement: Supplementary file 1 [file get_supplementary_file.php]

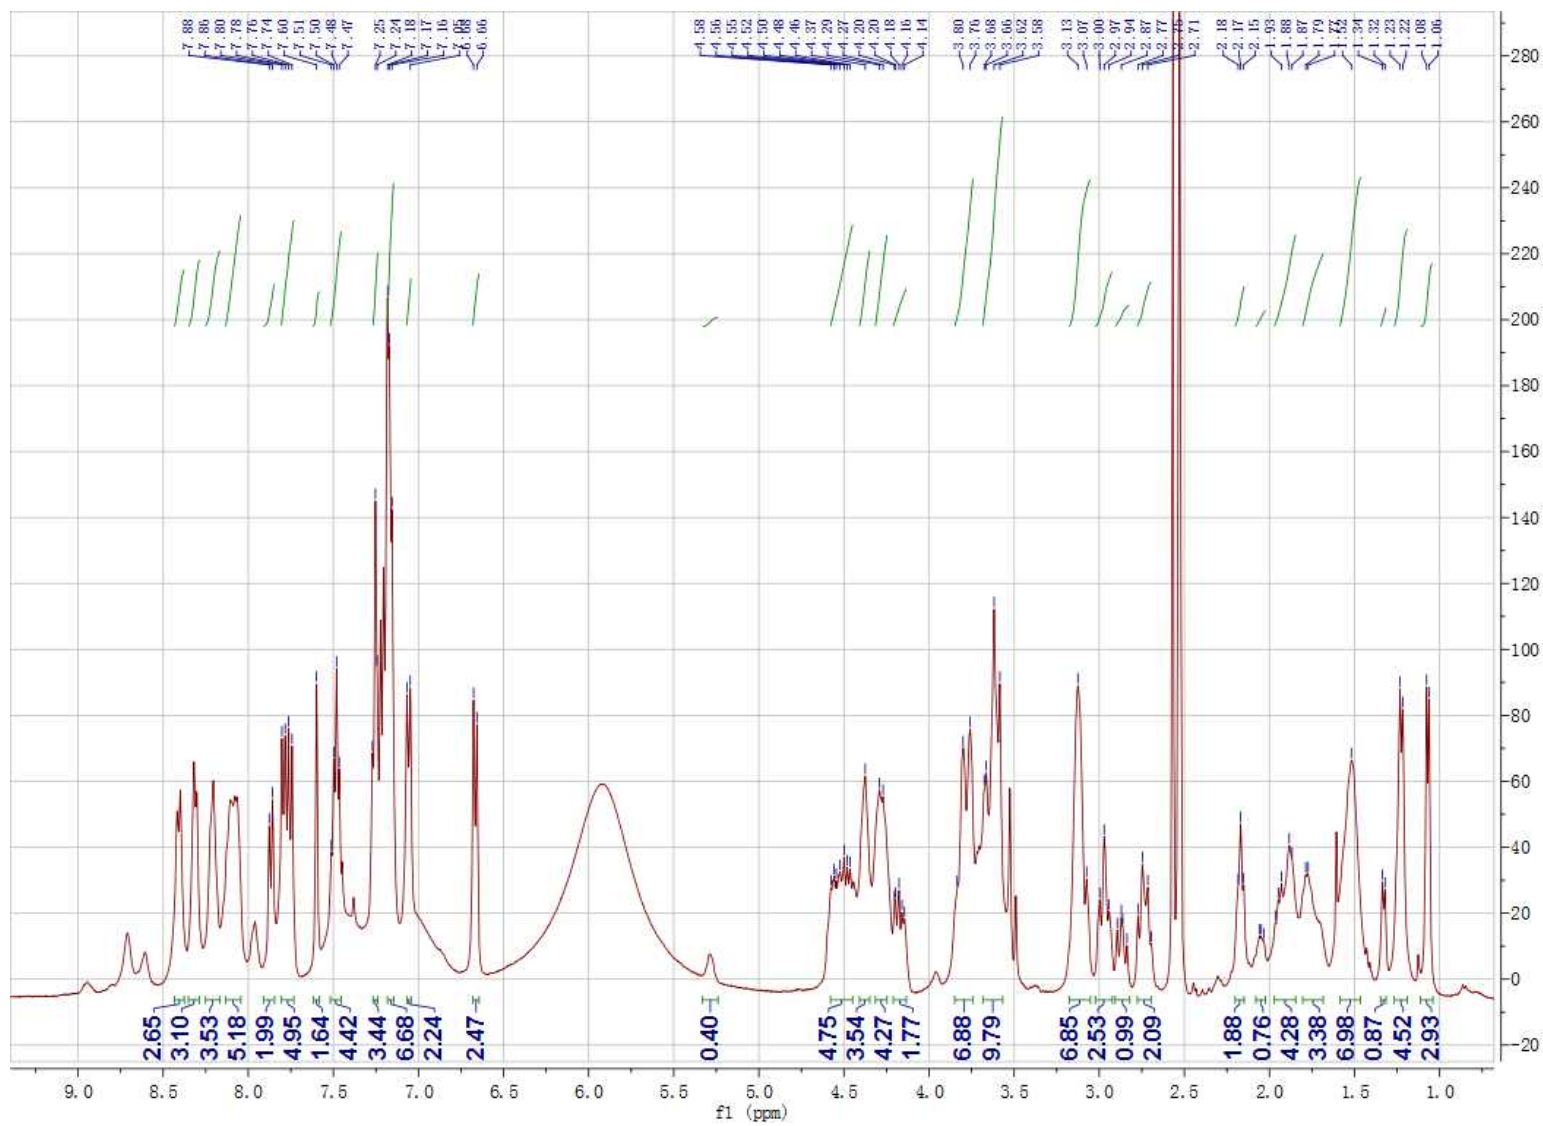

**Figure S1**

|                      |          |                    |           |                        |              |                               |                     |
|----------------------|----------|--------------------|-----------|------------------------|--------------|-------------------------------|---------------------|
| <b>Sample Name</b>   | Sample33 | <b>Position</b>    | P1-D6     | <b>Instrument Name</b> | Instrument 1 | <b>User Name</b>              |                     |
| <b>Inj Vol</b>       | -1       | <b>InjPosition</b> |           | <b>SampleType</b>      | Sample       | <b>IRM Calibration Status</b> | Some Ions Missed    |
| <b>Data Filename</b> | PEP-1.d  | <b>ACQ Method</b>  | chen-ms.m | <b>Comment</b>         |              | <b>Acquired Time</b>          | 7/4/2017 7:33:05 PM |

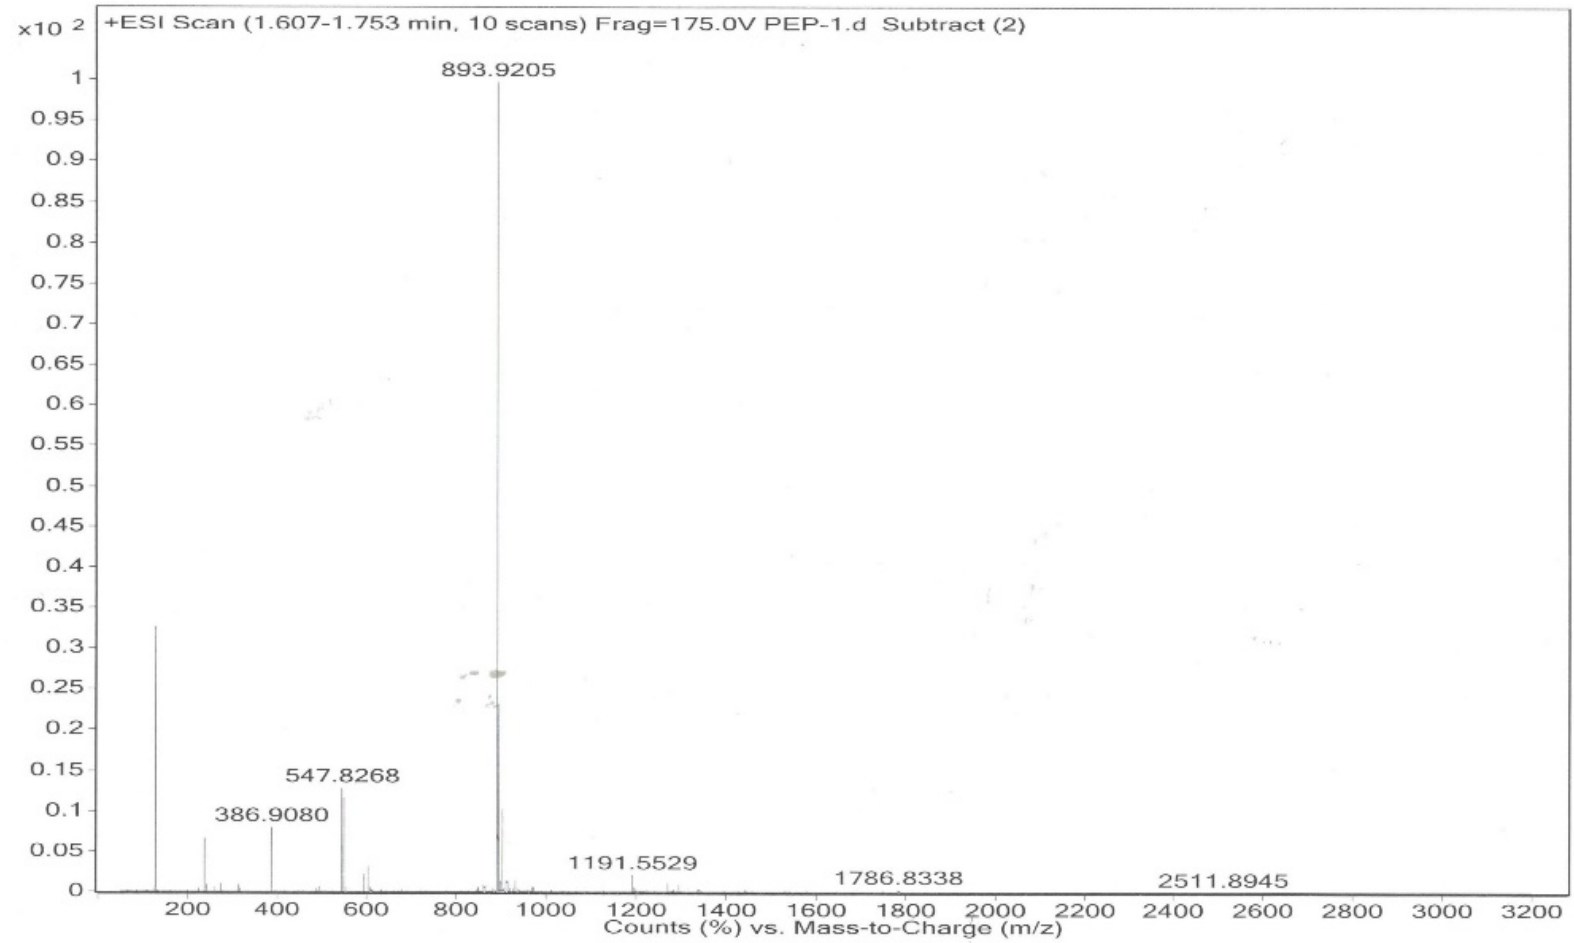

**Figure S2**

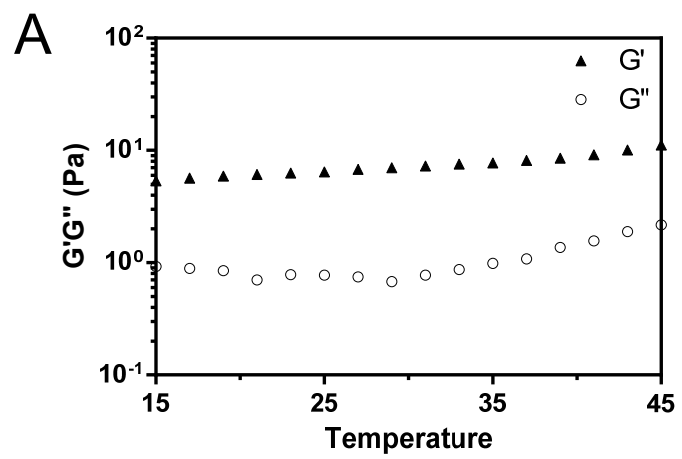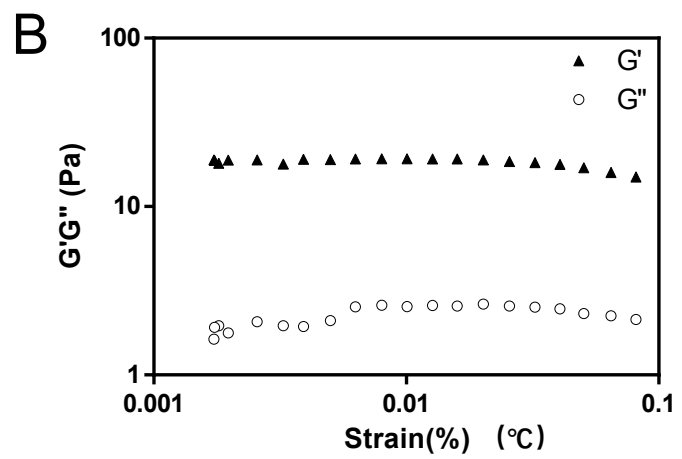

**Figure S3**

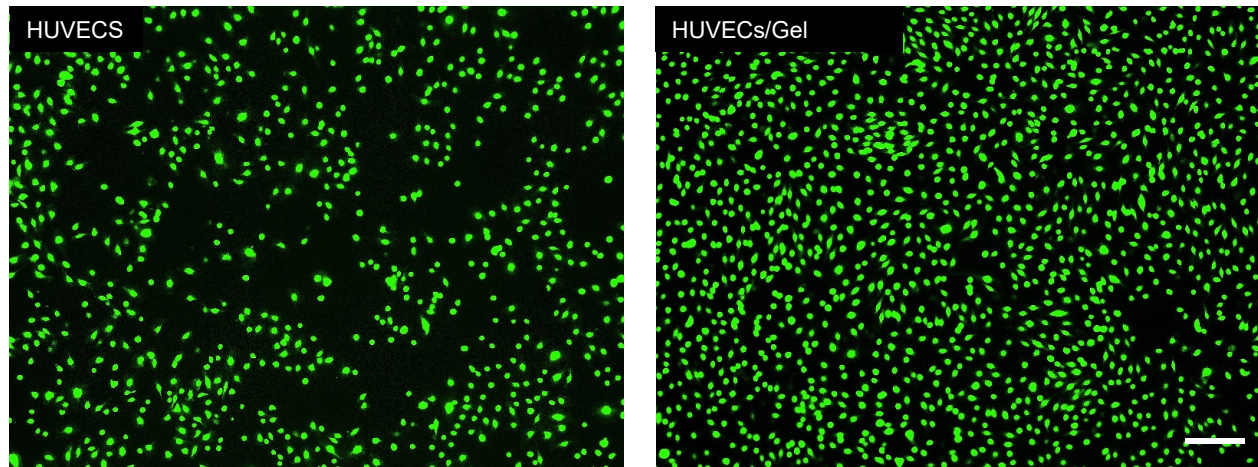

**Figure S4**

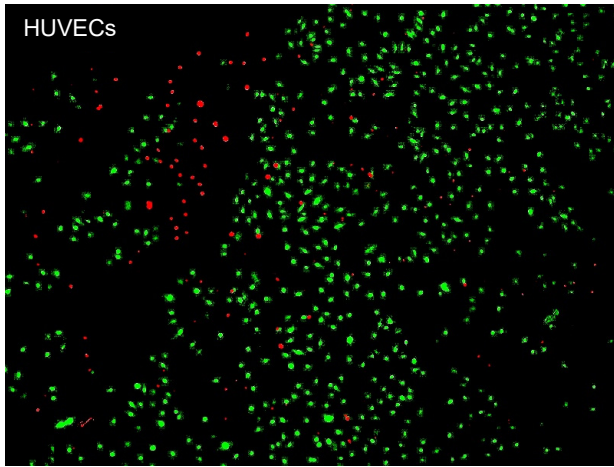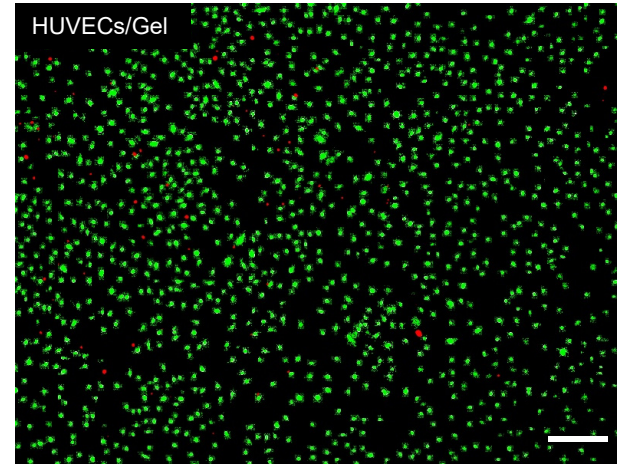

**Figure S5**

### Supplemental figure legends

**Fig. S1.**  $^1\text{H}$ -NMR spectrum of Nap- $^{\text{D}}\text{F}^{\text{D}}\text{FG}$ -GYGSSRRAPQT. **Fig. S2.** HR-MS spectrum of Nap-DFDFG-GYGSSRRAPQT. **Fig. S3. (A)** Temperature-dependent rheological analysis for self-assembling IGF-1C. **(B)** Strain-dependent rheological analysis for self-assembling IGF-1C. **Fig. S4.** Proliferation assay of HUVECs (live/dead staining). **Fig. S5.** Apoptosis assay of HUVECs (live/dead staining).
